# Supplementary material for: NUCLEAR FACTOR Y, Subunit A (NF-YA) Proteins Positively Regulate Flowering and Act Through FLOWERING LOCUS T
Source: PubMed Central journal article supplement (PMC5157953; doi:10.1371/journal.pgen.1006496), 2016-12-15
Supplement: pgen.1006496.s003.pdf [file pgen.1006496.s003.pdf]

**A***b2b3* background*b2b3*

p35S:B2-YFP

p35S:B2<sup>E65R</sup>-YFP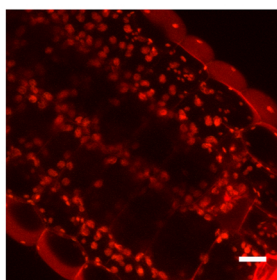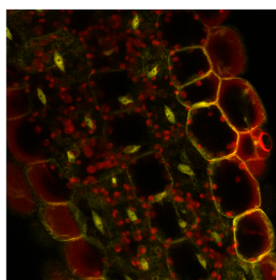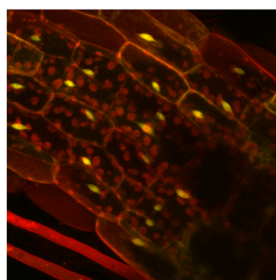**B**

# of leaves

at flowering

37 12

&gt;31

*b2b3* background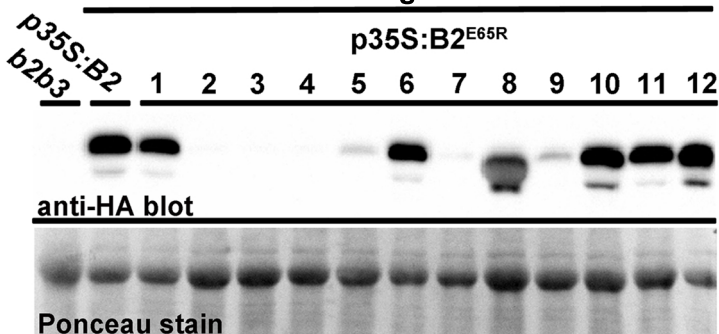**C***p35S:B2<sup>E65R</sup>* in *b2b3* background

# of leaves

at flowering

40 46 48 50 43 45 44 40 49 46 47 44

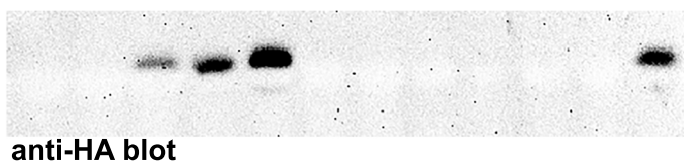**D**Average #  
of leaves

at flowering

11 18 44 40

B2-1

B2-2

B2<sup>E65R</sup>-1B2<sup>E65R</sup>-2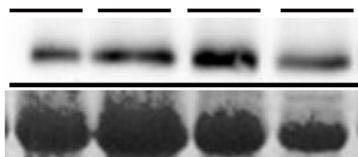

anti-HA blot

Ponceau stain
